# Supplementary material for: Perioperative Complications and Associated Factors Following Transurethral Resection of the Prostate Among Patients at Benjamin Mkapa Hospital, Tanzania
Source: Research Square preprint supplement (doi:10.21203/rs.3.rs-8231557/v1), 2026-01-13
Supplement: Supplementary file 1 [file 0d53e58499e832f273c4557f.pdf]

## **Supplementary file 1: Questionnaire**

Assessment of Perioperative Complications and Associated Factors Following Transurethral Resection of the Prostate Among Patients at Benjamin Mkapa Hospital in Tanzania.

### **Part 1: Demographics information**

1. Hospital registration number .....
2. Age .....
3. Occupation .....
4. Residence .....
5. Insurance status .....
6. Education level .....
7. Duration of hospital stay .....

### **Part 2: Assessment of Complications following TURP**

#### **What are the Complications following TURP?**

Put a tick if a complication has occurred, if no complication happened fill “NIL” in the table

| <b>No.</b> | <b>Complication</b>               | <b>Mark</b> |
|------------|-----------------------------------|-------------|
| 11         | TUR syndrome                      |             |
| 12         | Blood transfusion (BT)            |             |
| 13         | Urine Transmitted Infection (UTI) |             |
| 14         | Urinary incontinence (UI)         |             |
| 15         | Bladder Neck Contracture (BNC)    |             |
| 16         | Urethral stricture                |             |
| 17         | Ejaculatory dysfunction           |             |
| 18         | Clot retention                    |             |
| 19         | Repeat TURP                       |             |

### **Part 3: Clinical and Perioperative Variables**

- 20. Hospitalization time (in days) .....
- 21. Duration of catheterization (in hours) .....
- 22. Mode of TURP .....
- 23. Preoperative prostate volume .....
- 24. Preoperative IPSS .....
- 25. Duration of finasteride use before procedure (in months) .....
- 26. Hypertension .....
- 27. Diabetes mellitus .....
